# Supplementary material for: Increased cell survival of cells exposed to superparamagnetic iron oxide nanoparticles through biomaterial substrate-induced autophagy
Source: Royal Society of Chemistry journal article supplement (doi:10.1039/c5bm00573f), 2016-01-01
Supplement: c5bm00573f1.pdf [file c5bm00573f1.pdf]

**Supplemental data: Table S1, Figure S1–S4.**

**Table S1.** Characterization of the NPs used in this study.

| <b>Nanoparticles</b>                                                 | <b>Hydrodynamic diameter (nm)</b> | <b>Zeta potential (mV)</b> | <b>Polydispersion index (PDI)</b> |
|----------------------------------------------------------------------|-----------------------------------|----------------------------|-----------------------------------|
| <b>Fe<sub>3</sub>O<sub>4</sub> NPs<br/>(negatively charged)</b>      | <b>53.4 ± 1.2</b>                 | <b>-56.34 ± 1.34</b>       | <b>0.20</b>                       |
| <b>Fe<sub>3</sub>O<sub>4</sub> NPs<br/>(nearly neutral charged)*</b> | <b>36.9 ± 1.8</b>                 | <b>-9.6 ± 1.07</b>         | <b>0.19</b>                       |
| <b>Au NPs**</b>                                                      | <b>35.3 ± 0.2</b>                 | <b>-20.99 ± 0.91</b>       | <b>0.26</b>                       |

\*Stabilized by polyethylene glycol (PEG).

\*\*Stabilized by sodium citrate.

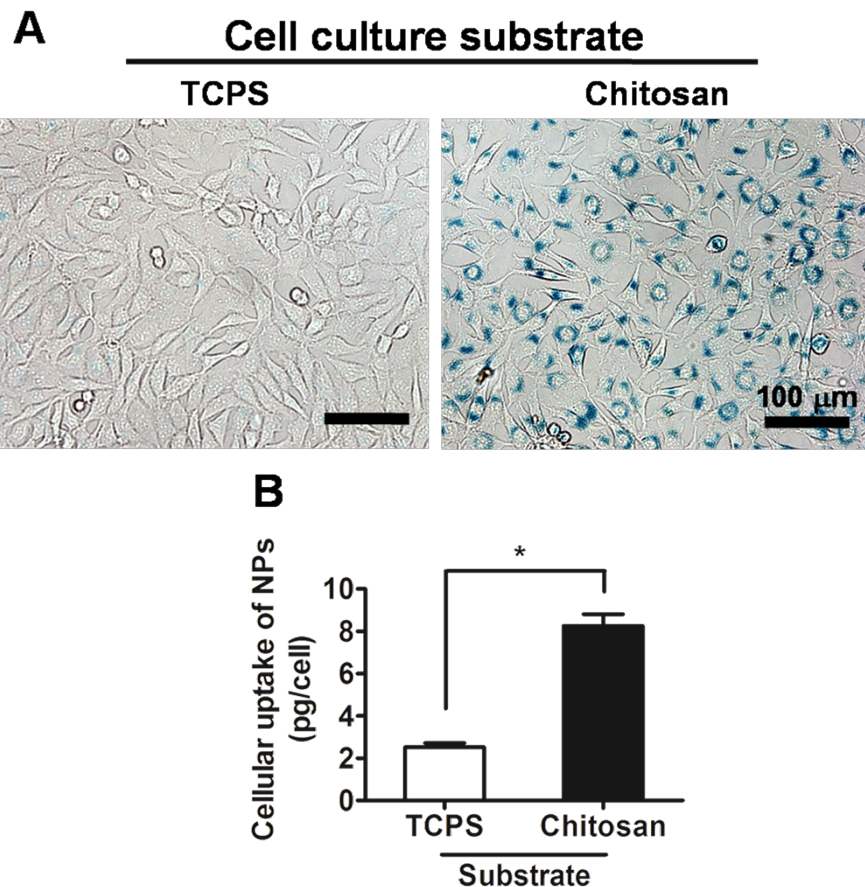

**Figure S1.** Cellular uptake of nearly neutral charged  $\text{Fe}_3\text{O}_4$  NPs on TCPS or chitosan. (A) Prussian blue staining for L929 fibroblasts co-cultured with  $\text{Fe}_3\text{O}_4$  NPs (25  $\mu\text{g}/\text{ml}$ ) on different substrates (TCPS or chitosan) for 24 h. (B) The amount of  $\text{Fe}_3\text{O}_4$  NP uptake by cells (pg per cell, based on the mass of iron) grown on different substrates, quantified by ICP-MS (Agilent 7500ce, Japan). Cells were washed with PBS, detached with 0.25% trypsin, and collected by centrifugation. Cell pellets were dissolved in 3%  $\text{HNO}_3$  and the iron concentration was determined using the ICP-MS. The cell number was measured by the DNA Hoechst 33528 dye stain assay. The average amount of uptake per cell (pg/cell) was then calculated. \* $p < 0.05$  among the indicated groups.

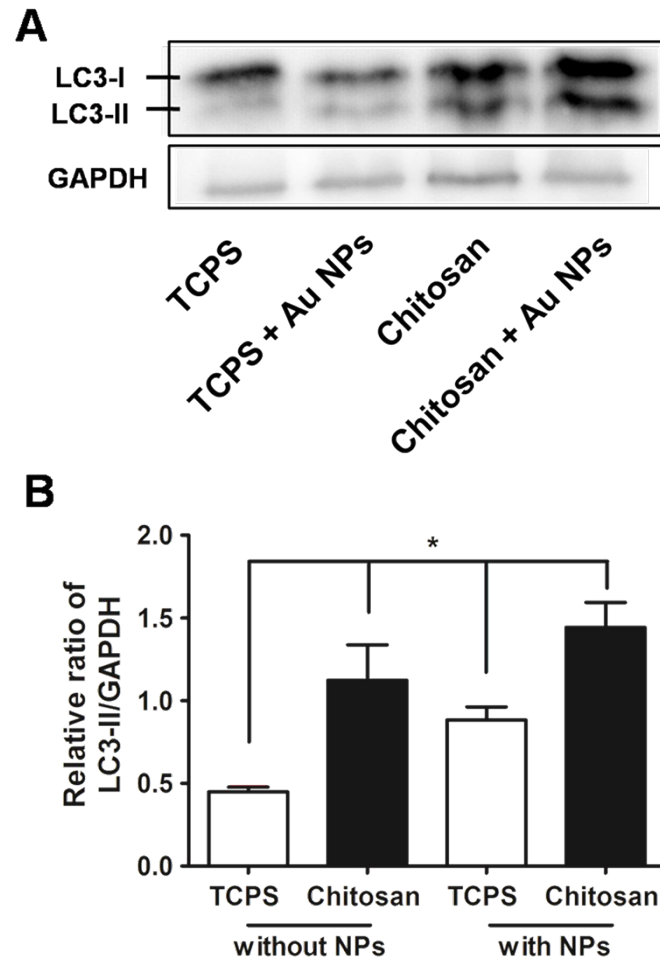

**Figure S2.** The autophagy responses for fibroblasts on TCPS or chitosan with or without Au NP treatment. Fibroblasts were cultured on the substrates for 12 h before the medium was replaced with that containing 25  $\mu\text{g/ml}$  Au NPs and cultured for another 6 h. (A) The expression of LC3-II (autophagy-associated protein) analyzed by Western blot. (B) The semi-quantification of LC3-II protein levels from Western blot.

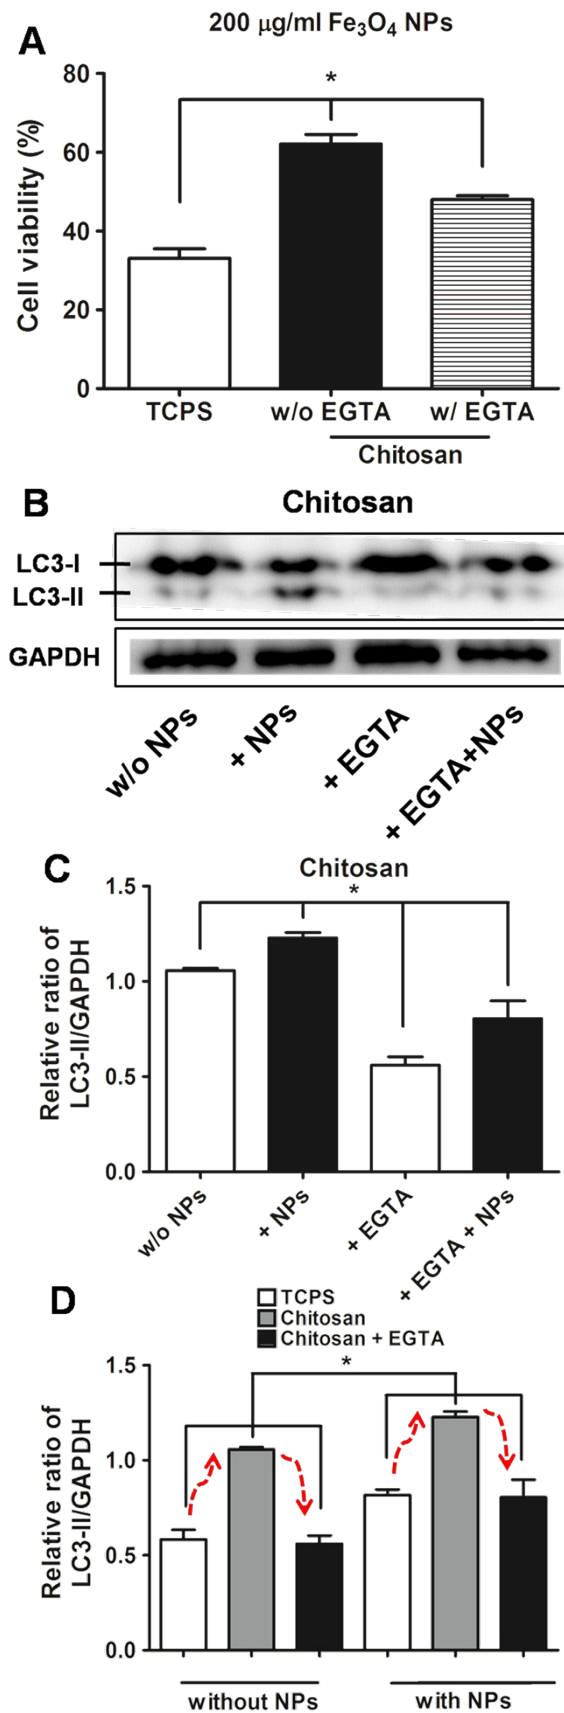

**Figure S3.** The cell viability and autophagy response of fibroblasts on chitosan

substrates upon NP treatment. (A) The viability of fibroblasts cultured on chitosan, treated with or without EGTA, and exposed to Fe<sub>3</sub>O<sub>4</sub> NPs (200 µg/ml) for 48 h. (B) The protein expression of LC3-II (autophagy) for fibroblasts on chitosan substrates treated with NPs and/or EGTA, analyzed by Western blot. (C, D) The semi-quantification of LC3-II protein levels from Western blot. \*p < 0.05 among the indicated groups.

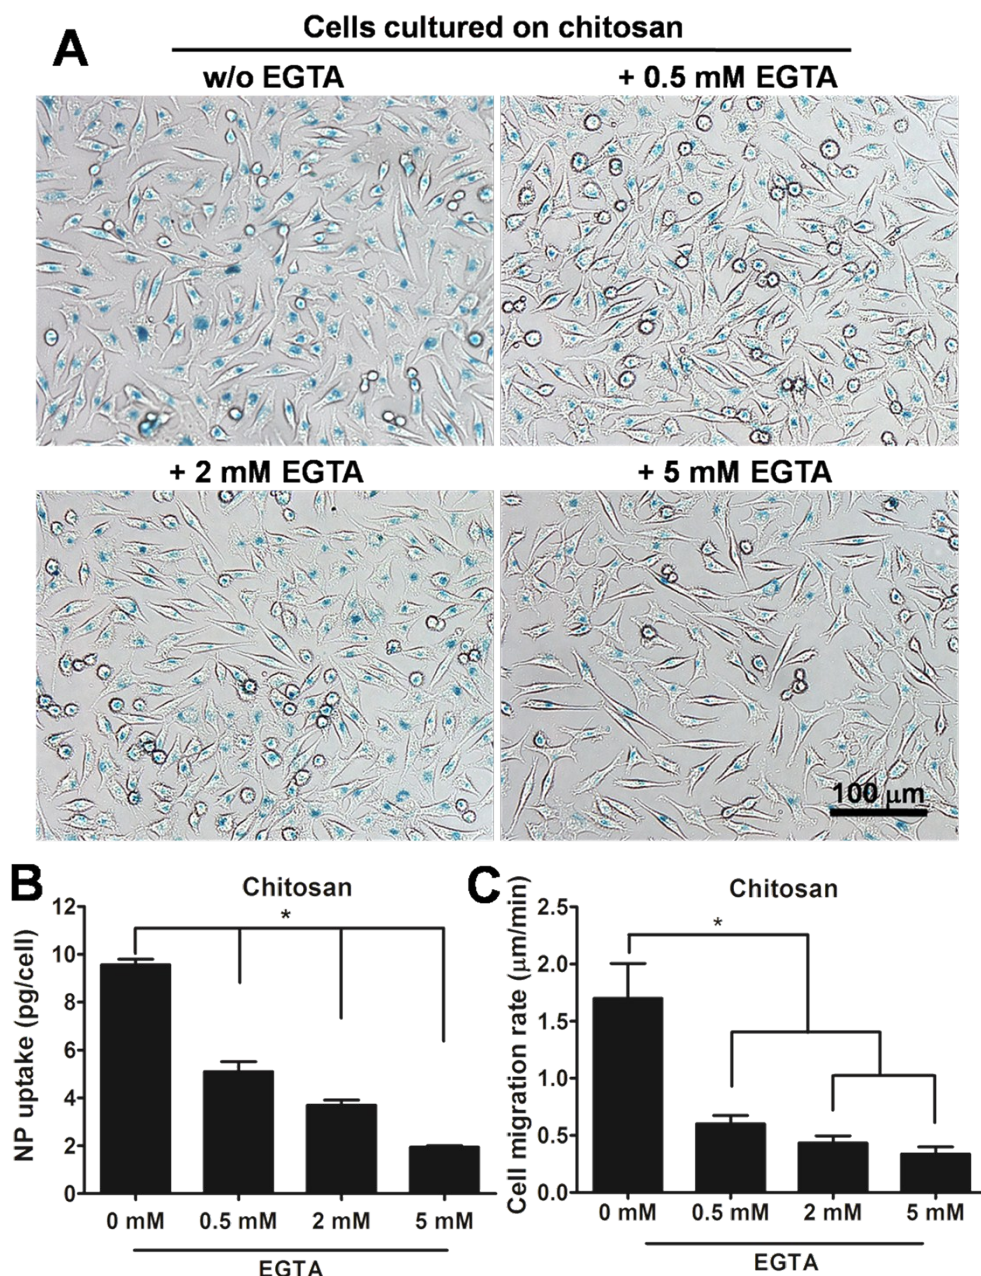

**Figure S4.** The effect of calcium ion on the cell migration and uptake of  $\text{Fe}_3\text{O}_4$  NPs. L929 fibroblasts exposed to  $\text{Fe}_3\text{O}_4$  NPs (25  $\mu\text{g/mL}$ ) and treated with different concentrations of EGTA on chitosan materials for 24 h. (A) Prussian blue staining for cells treated with EGTA. (B) The amount of NP uptake for cells under EGTA treatment, quantified by AA. (C) The average migration rate for cells grown on chitosan with EGTA treatment.
